# Supplementary material for: Whole Genome Sequencing of SARS-CoV-2 in Cats and Dogs in South Korea in 2021
Source: MDPI journal article supplement (doi:10.3390/vetsci10010006), 2022-12-23
Supplement: s1 [file s1]

**Supplementary Table S1.** SARS-CoV-2 positive animals which samples were provided to APQA from Provincial/City government veterinary authorities for variants monitoring

| Province/City | Cats | Dogs | Total |
|---------------|------|------|-------|
| Seoul         | 38   | 65   | 102   |
| Daegu         | -    | 1    | 1     |
| Gwangju       | 1    | -    | 1     |
| Sejong        | 1    | -    | 1     |
| Gyeonggi      | 0    | 2    | 2     |
| Gyeongnam     | 1    | 0    | 1     |
| Jeonbuk       | -    | 1    | 1     |
|               | 41   | 69   | 110   |

**Supplementary Table S2.** Results of Illumina sequencing of SARS-CoV-2 in dogs and cats

| No. | Species | Strain         | # mapped reads | % mapped reads * | Average length (bp) | Total nucleotide sequences | Genome size (bp) | Coverage (x) |
|-----|---------|----------------|----------------|------------------|---------------------|----------------------------|------------------|--------------|
| 1   | cat     | 01-Seoul-01    | 5,086,456      | 96.5             | 115                 | 586,829,082                | 29,896           | 2,193.8      |
| 2   | cat     | 02-Sejong-01   | 4,022,096      | 98.3             | 123                 | 497,461,572                | 29,902           | 1,825.7      |
| 3   | dog     | Seoul-002      | 807,176        | 89.7             | 150                 | 121,389,554                | 29,905           | 481.7        |
| 4   | dog     | 03-Gyeonggi-01 | 1,922,464      | 96.1             | 127                 | 245,540,138                | 29,896           | 1,464.4      |
| 5   | cat     | 04-Gwangju-01  | 3,857,452      | 97.7             | 122                 | 474,319,250                | 29,874           | 2,302.7      |
| 6   | cat     | Seoul-004      | 1,034,282      | 93.1             | 150                 | 155,578,014                | 29,906           | 547.3        |
| 7   | cat     | Seoul-005      | 4,257,408      | 98.5             | 125                 | 532,586,970                | 29,903           | 2,474.3      |
| 8   | cat     | Seoul-006      | 4,188,844      | 98.2             | 125                 | 524,834,426                | 29,903           | 2,400.2      |
| 9   | cat     | Seoul-007      | 4,625,324      | 98.3             | 125                 | 581,826,502                | 29,903           | 2,497.9      |
| 10  | cat     | Seoul-014      | 2,705,296      | 98.2             | 127                 | 345,727,954                | 29,891           | 1,978.6      |
| 11  | dog     | 05-Daegu-01    | 4,890,204      | 98.3             | 124                 | 608,292,524                | 29,903           | 2,537.6      |
| 12  | dog     | Seoul-016      | 2,425,346      | 98.0             | 128                 | 311,669,414                | 29,874           | 1,842.2      |
| 13  | cat     | Seoul-018      | 2,208,780      | 98.5             | 128                 | 284,289,108                | 29,894           | 1,734.3      |
| 14  | cat     | Seoul-19       | 7,785,030      | 98.1             | 122                 | 950,116,286                | 29,893           | 2,559.0      |
| 15  | cat     | Seoul-28       | 2,751,768      | 97.6             | 126                 | 349,218,456                | 29,903           | 1,956.6      |
| 16  | cat     | Seoul-29       | 3,703,022      | 97.9             | 125                 | 463,667,784                | 29,903           | 1,816.2      |
| 17  | dog     | 06-Jeonbuk-01  | 4,683,960      | 92.7             | 115                 | 540,160,400                | 29,871           | 2,594.3      |
| 18  | cat     | Seoul-036      | 4,127,046      | 98.6             | 126                 | 523,068,192                | 29,883           | 2,386.6      |
| 19  | dog     | Seoul-038      | 3,801,266      | 97.5             | 121                 | 462,279,280                | 29,869           | 2,248.0      |
| 20  | cat     | Seoul-046      | 3,321,530      | 97.7             | 123                 | 411,047,684                | 29,886           | 1,784.1      |
| 21  | cat     | Seoul-049      | 4,112,840      | 98.3             | 124                 | 510,836,652                | 29,890           | 2,475.1      |
| 22  | cat     | Seoul-050      | 3,876,810      | 98.5             | 126                 | 490,541,102                | 29,890           | 2,330.2      |
| 23  | dog     | Seoul-053      | 4,896,398      | 98.3             | 124                 | 607,393,692                | 29,893           | 2,615.4      |
| 24  | dog     | Seoul-054      | 6,489,812      | 98.1             | 121                 | 790,647,596                | 29,890           | 2,359.5      |
| 25  | dog     | Seoul-059      | 2,151,876      | 98.0             | 127                 | 273,860,334                | 29,890           | 1,755.3      |
| 26  | cat     | Seoul-061      | 2,248,074      | 98.0             | 127                 | 287,740,460                | 29,890           | 1,629.0      |
| 27  | dog     | Seoul-065      | 5,313,056      | 97.6             | 121                 | 648,118,512                | 29,884           | 2,675.1      |
| 28  | cat     | Seoul-069      | 3,666,434      | 98.0             | 122                 | 448,043,920                | 29,893           | 2,199.2      |
| 29  | dog     | Seoul-071      | 4,073,256      | 97.8             | 125                 | 513,108,526                | 29,893           | 2,453.9      |

|    |     |                      |           |      |     |             |        |         |
|----|-----|----------------------|-----------|------|-----|-------------|--------|---------|
| 30 | cat | Seoul-076            | 3,482,942 | 96.7 | 91  | 319,058,188 | 29,891 | 2440.0  |
| 31 | cat | Seoul-077            | 2,719,214 | 98.4 | 128 | 350,049,590 | 29,890 | 1,898.3 |
| 32 | dog | 07-Gyeonggi-North-01 | 2,834,718 | 81.9 | 120 | 342,888,082 | 29,877 | 1,875.1 |
| 33 | dog | Seoul-079            | 3,993,942 | 95.9 | 124 | 498,228,148 | 29,895 | 2,226.6 |
| 34 | dog | Seoul-081            | 4,376,248 | 97.6 | 127 | 557,002,376 | 29,890 | 2,449.8 |
| 35 | cat | Seoul-082            | 2,993,146 | 97.2 | 126 | 377,302,156 | 29,890 | 2,009.6 |
| 36 | cat | Seoul-093            | 3,780,048 | 98.3 | 126 | 479,637,102 | 29,889 | 2,322.9 |
| 37 | cat | Seoul-097            | 4,418,244 | 98.2 | 126 | 557,507,462 | 29,889 | 2,480.9 |
| 38 | cat | Seoul-098            | 5,621,860 | 97.7 | 123 | 695,358,720 | 29,885 | 2,725.7 |
| 39 | cat | Seoul-099            | 4,413,264 | 97.9 | 126 | 557,565,960 | 29,888 | 2,395.7 |
| 40 | dog | 08-Gyeongnam-01      | 5,334,494 | 98.1 | 123 | 659,661,942 | 29,878 | 2,127.5 |

\* The frequency of the lineage among positive samples in cats or dogs.
